# Supplementary material
Source: Springer Nature journal article supplement (https://www.springermedizin.de/resource/supplementary/12911_2011_624_MOESM5_ESM.pdf/9525928)
Supplement: MOESM5 [file 9525928]

## ISSUE:

No standard way to do work

## BACKGROUND

Anesthetist should write all medication and direction for the patient in pre-anesthesia form

All these information should be in patient file as a history

Some directions are given verbally to nurse

## CURRENT CONDITION

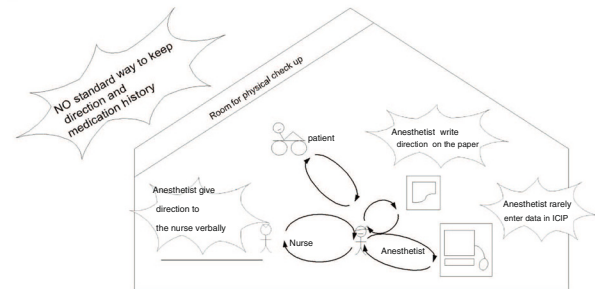

## PROBLEM ANALYSIS

1. Most of the time anesthetist use pre-anesthesia paper form to write medication and direction

Why? It is faster to write data on paper

Why? There are so many information need to be written by anesthetist

Why? All reports such as lab, echo and lung function should be written to the form

2. Most anesthetists are not eager to use ICIP in anesthesia process

Why? It is time consuming to enter data in ICIP

Why? There are so many fields that should be filled in ICIP such as lab, echo and lung function report

Why? They believe that it is necessary to do their work regardless of the way it is done

Why? They are not too familiar with using PC and it wastes their time especially when they are tired or busy

3. Anesthetist gives verbal medication order to the nurse

Why? It is necessary for nurse to follow the direction before the operation day

Why? If anesthetist write direction in ICIP, they still have to give direction to nurse verbally as nurse do not have any access to ICIP

## TARGET CONDITION

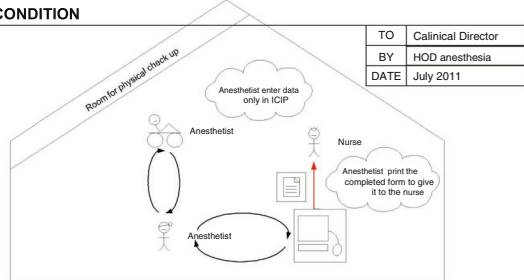

## COUNTERMEASURES

Number of pre-anesthesia form that is not completed/ printed prior to the induction of anesthesia

## IMPLEMENTATION PLAN

| What                                 | Who           | Duration | Outcome                                          |
|--------------------------------------|---------------|----------|--------------------------------------------------|
| Inform nurses about new work process | HOD           | 0.5 hour | Reduce wasted time for anesthetist               |
| Nurse ICIP training                  | IT Department | 2 hours  | Learn how to work with ICIP to begin new process |

## FOLLOW UP

|                        |            |
|------------------------|------------|
| Cost                   | \$\$\$     |
| Man/hour               | \$\$\$     |
| Benefit                | \$\$\$     |
| Reduce waste           | Intangible |
| Reduce medication risk | Intangible |
| Organized process      | Intangible |

## TEST

Monitor the new workflow and participant in new process which includes anaesthetist and nurse
